# Supplementary material for: Synthesis, structure and magnetic properties of a series of dinuclear heteroleptic Zn2+/Ln3+ Schiff base complexes: effect of lanthanide ions on the slow relaxation of magnetization
Source: Royal Society of Chemistry journal article supplement (doi:10.1039/c9dt02228g), 2019-01-01
Supplement: c9dt02228g1.pdf [file c9dt02228g1.pdf]

## SUPPORTING INFORMATION

### **Synthesis, structure and magnetic properties of a series of dinuclear heteroleptic Zn<sup>2+</sup>/Ln<sup>3+</sup> Schiff base complexes: effect of the lanthanide ion over the slow relaxation of the magnetization.**

Ahlem-Linda Boulkedid,<sup>a,b</sup> Adel Beghidja,<sup>a</sup> Chahrazed Beghidja,<sup>a</sup> Yannick Guari,<sup>b</sup> Joulia Larionova,<sup>b</sup> Jérôme Long<sup>\*b</sup>

*a. Unité de Recherche de Chimie de l'Environnement et Moléculaire Structurale (CHEMS), Université frères Mentouri Constantine, Route Aïn elbey, 25000 Constantine, (Algérie). E-mail : abeghidja@umc.edu.dz*

*b. Institut Charles Gerhardt Montpellier, UMR 5253, Ingénierie Moléculaire et Nano-Objets, Université de Montpellier, ENSCM, CNRS, Place E. Bataillon, 34095 Montpellier Cedex 5 (France).*

## TABLE OF CONTENTS

|                                                                                                                                                                                                         |    |
|---------------------------------------------------------------------------------------------------------------------------------------------------------------------------------------------------------|----|
| Experimental Section.....                                                                                                                                                                               | 4  |
| General Conditions:.....                                                                                                                                                                                | 4  |
| Synthesis of 1-3. ....                                                                                                                                                                                  | 4  |
| Powder X-Ray diffraction .....                                                                                                                                                                          | 4  |
| Single-crystal X-Ray crystallography.....                                                                                                                                                               | 4  |
| Magnetic Measurements.....                                                                                                                                                                              | 5  |
| Scheme S1: Chemical structures of H <sub>2</sub> L (left) and o-vanH (right). ....                                                                                                                      | 5  |
| Figure S1: Top: IR spectra for compounds 1-3. Bottom: Powder X-ray diffraction patterns (Cu K $\alpha$ 1) from experiment and simulated for 1-3. ....                                                   | 6  |
| Figure S2: Perspective view of the crystal packing for 2 along the <i>a</i> crystallographic axis. The hydrogen bonding is indicated by green dashed lines. ....                                        | 7  |
| Figure S3: Left: temperature dependence of $\chi T$ under an applied magnetic field of 1000 Oe for 1-3. Right: field dependence of the magnetization at 1.8 K for 1-3. ....                             | 7  |
| Figure S4. Temperature dependence of $\chi'$ and $\chi''$ for 2 for different frequencies.....                                                                                                          | 8  |
| Figure S5: Cole-Cole (Argand) plots obtained using the ac susceptibility data for 2 (0 Oe). The solid lines correspond to the best fit obtained with a generalized Debye model. ....                    | 8  |
| Figure S6. Frequency dependence of $\chi'$ and $\chi''$ for 2 at 15 K for various dc fields. ....                                                                                                       | 9  |
| Figure S7. Field dependence of the relaxation time for 2 at 15 K. The solid line represents the fit with Eq. 2.....                                                                                     | 9  |
| Figure S8. Frequency dependence of $\chi'$ and $\chi''$ for 2 under a 2000 Oe dc field. ....                                                                                                            | 10 |
| Figure S9: Cole-Cole (Argand) plots obtained using the ac susceptibility data for 2 (2000 Oe) The solid lines correspond to the best fit obtained with a generalized Debye model.....                   | 10 |
| Figure S10. Frequency dependence of $\chi'$ and $\chi''$ at 2 K under various dc fields for 1 and 3. ....                                                                                               | 11 |
| Figure S11. Field dependence of the relaxation time for 1 and 3 at 2 K. The solid lines represent the fit with Eq. 2. ....                                                                              | 12 |
| Figure S12. Frequency dependence of $\chi'$ and $\chi''$ for 1 (2000 Oe) and 3 (500 Oe).....                                                                                                            | 12 |
| Figure S13. Cole-Cole (Argand) plots obtained using the ac susceptibility data for 1 (2000 Oe) and 3 (500 Oe). The solid lines correspond to the best fit obtained with a generalized Debye model. .... | 13 |
| Figure S14. Orientation of the anisotropic axis (purple) for 2 obtained with the MAGELLAN software. <sup>2</sup> .....                                                                                  | 13 |
| Table S1. The crystal data and structures refinement details for complexes 1–3.....                                                                                                                     | 14 |
| Table S2. Bond distances (in Å) for the two crystallographically independent metallic coordination environments present in compounds 1-3 .....                                                          | 15 |
| Table S3. Bond angles (in degrees) for the two crystallographically independent metallic coordination environments present in compounds 1-3 .....                                                       | 15 |
| Table S4. Hydrogen bonding geometrical details (distances in Å and angles in degrees).....                                                                                                              | 17 |

|                                                                                                               |    |
|---------------------------------------------------------------------------------------------------------------|----|
| for compounds 1-3 .....                                                                                       | 17 |
| Table S5. SHAPE analysis for compounds 1-3 .....                                                              | 18 |
| Table S6. Fitting of the Cole-Cole plots with a generalized Debye model under a zero dc field for 2.<br>..... | 18 |
| Table S7: Some examples of high energy barriers Zn/Dy SMMS. ....                                              | 19 |
| Table S8: Fit parameters of the field dependence of the relaxation time at 6 K for 1-3. ....                  | 19 |
| Table S9. Fitting of the Cole-Cole plots with a generalized Debye model under a 2000 Oe field for<br>2. ....  | 19 |
| Table S10. Fitting of the Cole-Cole plots with a generalized Debye model under a 2000 Oe field for<br>1. .... | 20 |
| Table S11. Fitting of the Cole-Cole plots with a generalized Debye model under a 500 Oe field for<br>3. ....  | 20 |
| References .....                                                                                              | 20 |

## Experimental Section

**General Conditions:** All experiments were carried out under aerobic conditions. All the solvents in these experiments were analytical grade. The lanthanide chloride salts were purchased from Alfa Aesar. The ligand  $H_2L$  ( $H_2L = N,N'$ -bis(3-methoxysalicylidene)-1,2-diaminoethane) has been synthesized according to a well-established procedure from the literature.<sup>1</sup> The purity of  $H_2L$  was checked by  $^1H$  NMR. Elemental analyses (C, H, N) was carried out with a Perkin-Elmer 2400 elemental analyzer. Infrared spectra were recorded in the range 4000–500  $cm^{-1}$  on a FT-IR Bruker ATR Vertex 70 Spectrometer.

### Synthesis of 1-3.

A series of hetero-dinuclear  $ZnLn$  complexes  $[ZnLCiLn(o\text{-van})(H_2O)(NO_3)] \cdot H_2O$  ( $Ln = Tb$  (**1**),  $Dy$  (**2**),  $Er$  (**3**)) was obtained from the reaction between one equivalent (0.1 mmol) of lanthanide chloride of ( $TbCl_3 \cdot 5H_2O$ ,  $DyCl_3 \cdot 5H_2O$ ,  $ErCl_3 \cdot 5H_2O$ , weighed respectively: 37.3 mg, 37.6 mg and 38.1 mg) and an equimolar solution of  $H_2L$  (0.2 mmol, 65.6 mg) and  $Zn(NO_3)_2 \cdot 6H_2O$  (0.2 mmol, 59.4 mg,) in methanol (15 mL). The mixtures were refluxed 5 hours at 60° C. Clear yellow solutions were obtained and were left to evaporate at room temperature. Within 48 h, yellow crystals suitable for single-crystal X-ray diffraction were obtained and separated by filtration. Yield based on  $Ln^{III}$ : 42 %, 41 %, 42 % for **1**, **2** and **3** respectively. Elemental Anal. Calcd.  $C_{26}H_{29}ClTbN_3O_{12}Zn$  C: 37.38%, H: 3.50%, N: 5.03% Found: C: 37.03, H: 3.62, N: 5.29 for (**1**). Calcd.  $C_{26}H_{29}ClDyN_3O_{12}Zn$  C: 37.22%, H: 3.48%, N: 5.01% Found: C: 37.03, H: 3.62, N: 5.29 for (**2**). Calcd.  $C_{26}H_{29}ClErN_3O_{12}Zn$  C: 37.01%, H: 3.46%, N: 4.98% Found: C: 37.23, H: 3.62, N: 5.19 for (**3**).

### Powder X-Ray diffraction

Powder XRD (PXRD) patterns were measured using a Bruker D8 diffractometer with a copper source operated at 1600 W, with step size = 0.02° and exposure time = 0.5 s per step. PXRD measurements were used to check the purity of the obtained microcrystalline products by a comparison of the experimental results with the calculated patterns obtained from single-crystal XRD data.

### Single-crystal X-Ray crystallography

Diffraction intensities for complexes **1–3** were collected on a Bruker-AXS APEX II CCD diffractometer at 293(2) K. The crystallographic data, conditions retained for the intensity data collection and some features of the structure refinements are listed in Table S1. The intensities were collected with Mo  $K\alpha$  radiation ( $\lambda = 0.71073 \text{ \AA}$ ). Data processing, Lorentz-polarization were performed using APEX.<sup>2</sup> The structure was solved by direct methods and refined by full-matrix least-squares methods on  $F^2$ , using the SHELXL-2018<sup>3</sup> program package. All non-hydrogen atoms were refined anisotropically. Hydrogen atoms in **1–3** were placed in calculated positions and were refined in the “riding” model with  $U(H)_{iso} = 1.2U_{eq}$  of their parent atoms ( $U(H)_{iso} = 1.5U_{eq}$  for methyl groups). Molecular plots were performed with the CrystalMaker and Mercury programs.<sup>4,5</sup> Geometrical calculations were carried out with PLATON.<sup>6</sup> CCDC–1913024 (**1**), 1913022 (**2**) and 1913023 (**3**) contains the supplementary crystallographic data

for this paper. These data are provided free of charge by The Cambridge Crystallographic Data Centre: [ccdc.cam.ac.uk/structures](http://ccdc.cam.ac.uk/structures).

### Magnetic Measurements

Magnetic susceptibility data were collected with a Quantum Design MPMS-XL SQUID magnetometer working in the range 1.8–300 K with the magnetic field up to 7 Tesla. The sample were prepared in a glove box. The data were corrected for the sample holder and the diamagnetic contributions calculated from the Pascal's constants. The AC magnetic susceptibility measurements were carried out in the presence of a 3 Oe oscillating field in zero or applied external DC field.

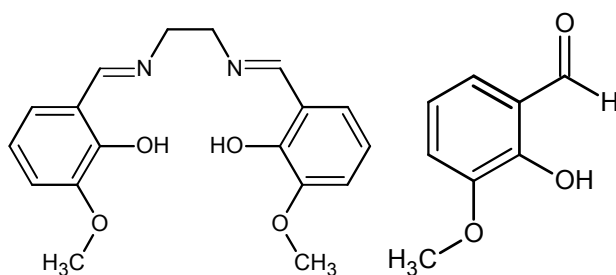

**Scheme S1:** Chemical structures of H<sub>2</sub>L (left) and o-vanH (right).

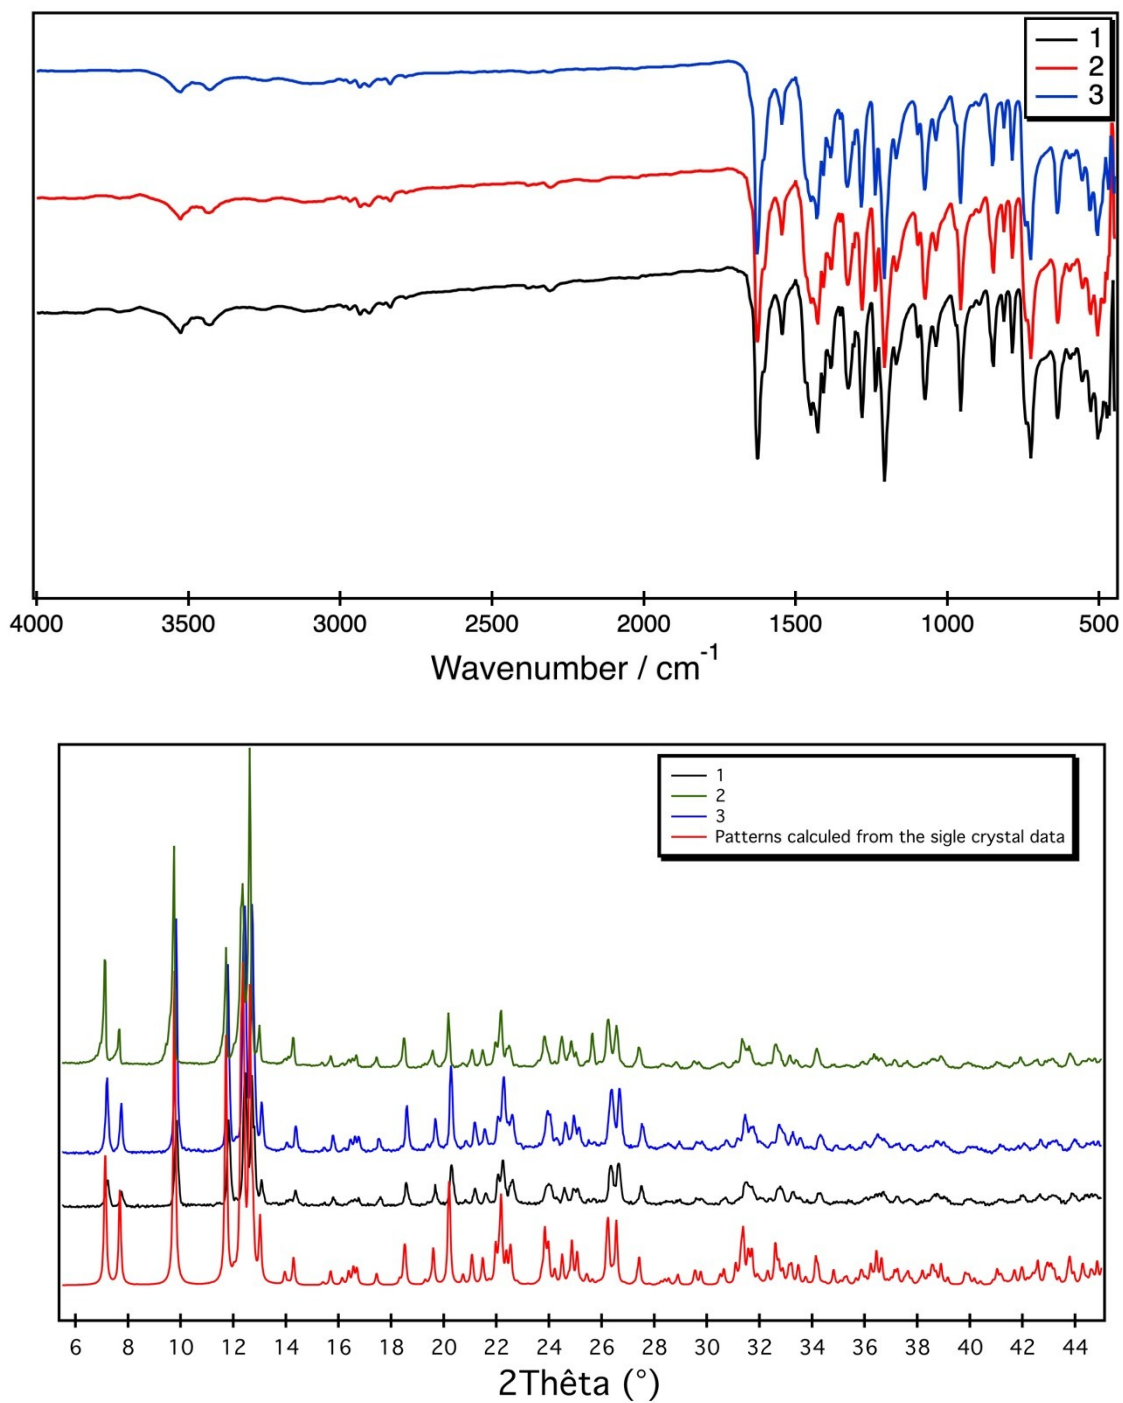

**Figure S1:** Top: IR spectra for compounds **1-3**. Bottom: Powder X-ray diffraction patterns (Cu K $\alpha$ 1) from experiment and simulated for **1-3**.

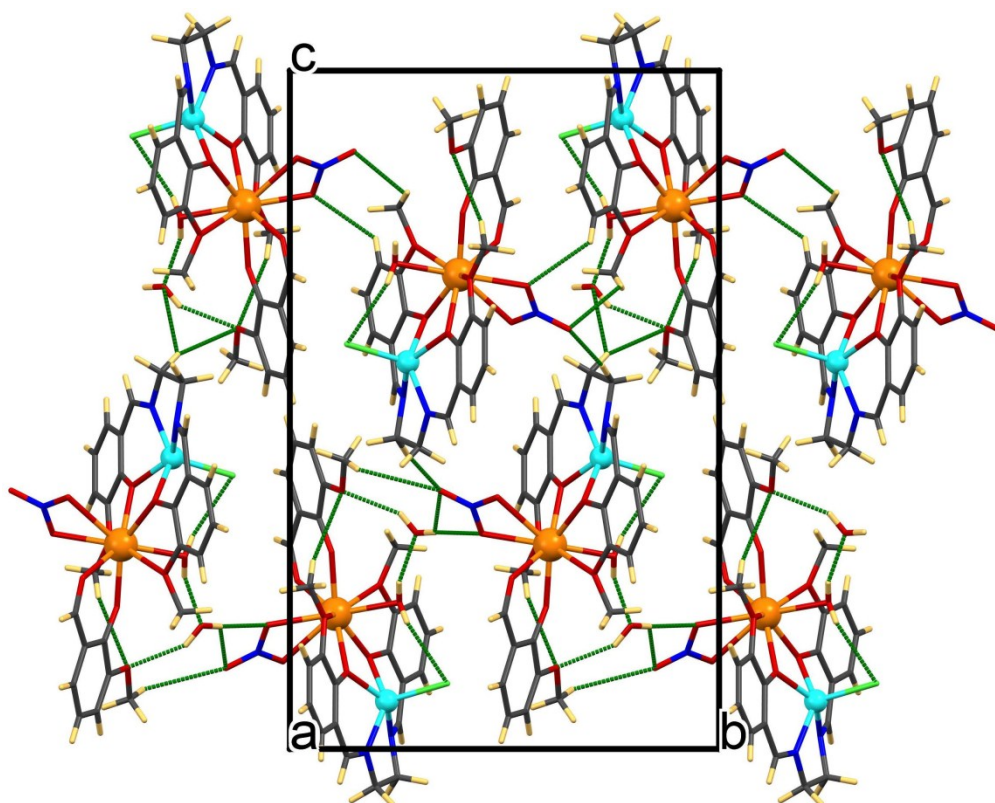

**Figure S2:** Perspective view of the crystal packing for **2** along the *a* crystallographic axis. The hydrogen bonding is indicated by green dashed lines.

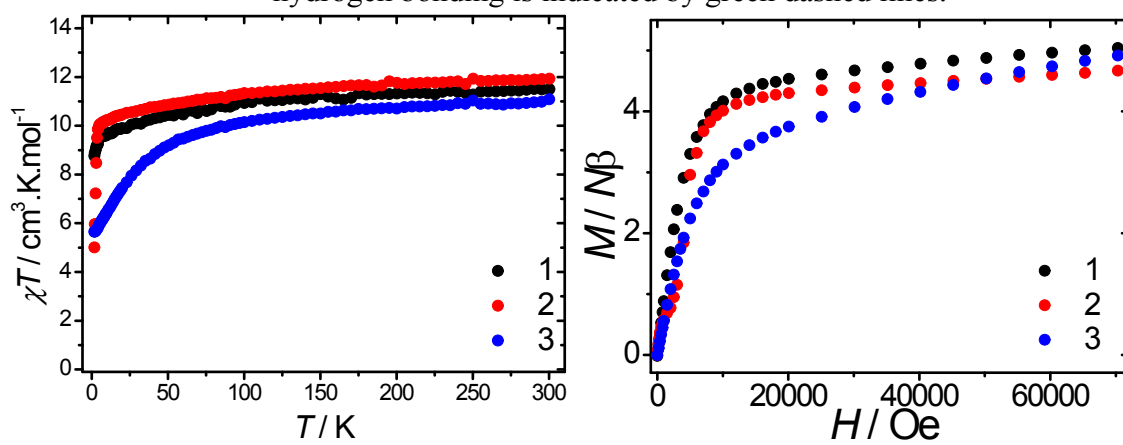

**Figure S3:** Left: temperature dependence of  $\chi T$  under an applied magnetic field of 1000 Oe for **1-3**. Right: field dependence of the magnetization at 1.8 K for **1-3**.

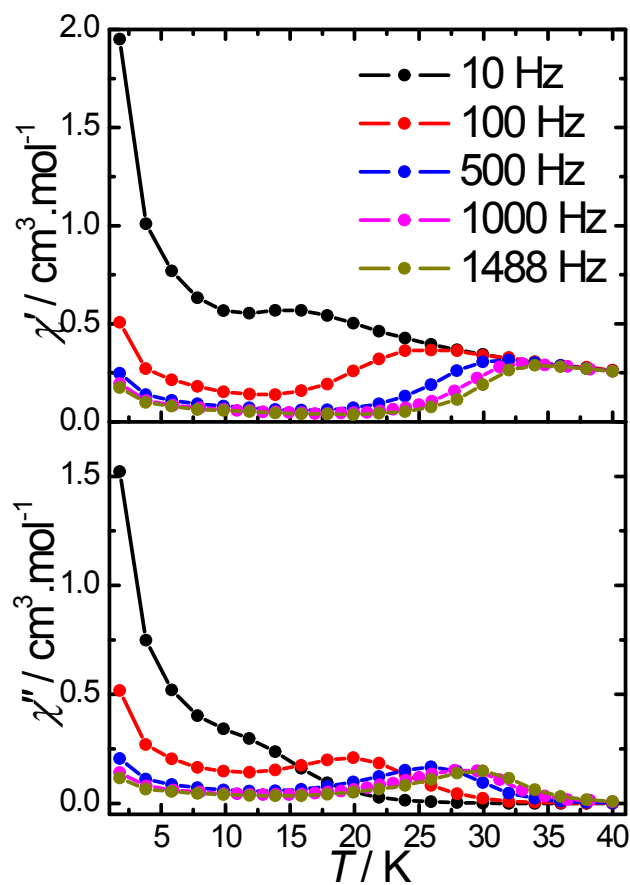

**Figure S4.** Temperature dependence of  $\chi'$  and  $\chi''$  for **2** for different frequencies.

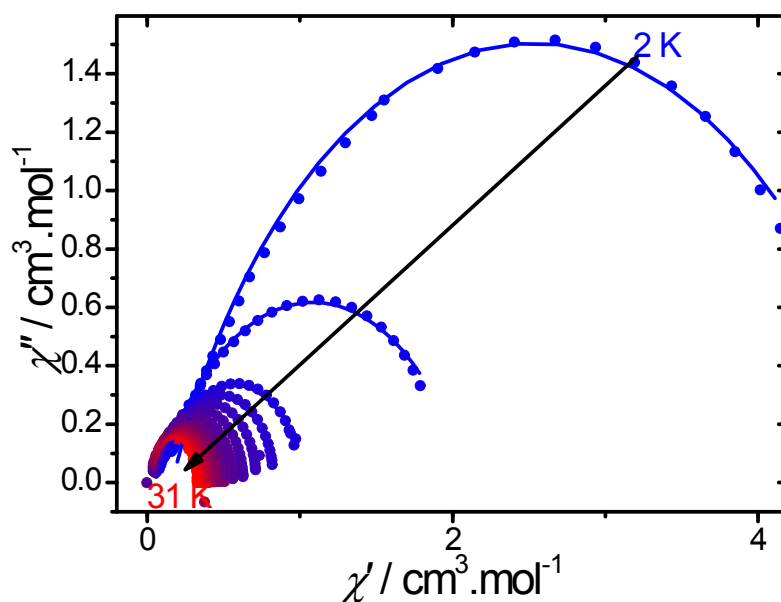

**Figure S5:** Cole-Cole (Argand) plots obtained using the ac susceptibility data for **2** (0 Oe). The solid lines correspond to the best fit obtained with a generalized Debye model.



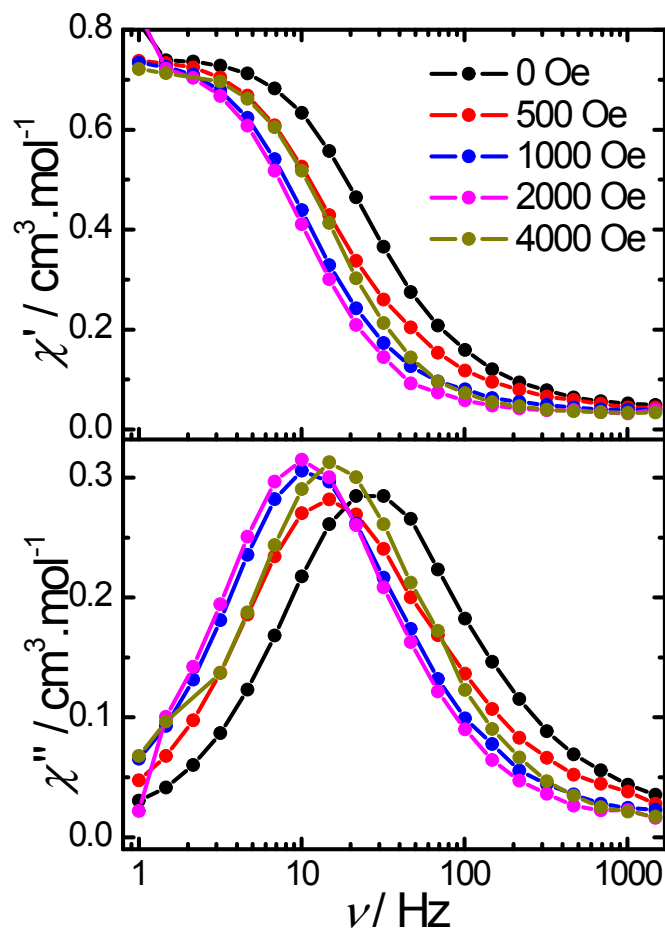

**Figure S6.** Frequency dependence of  $\chi'$  and  $\chi''$  for **2** at 15 K for various dc fields.

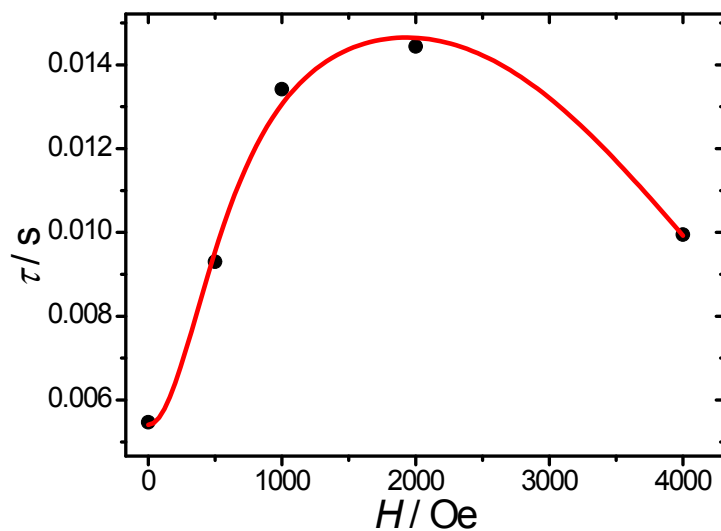

**Figure S7.** Field dependence of the relaxation time for **2** at 15 K. The solid line represents the fit with Eq. 2.

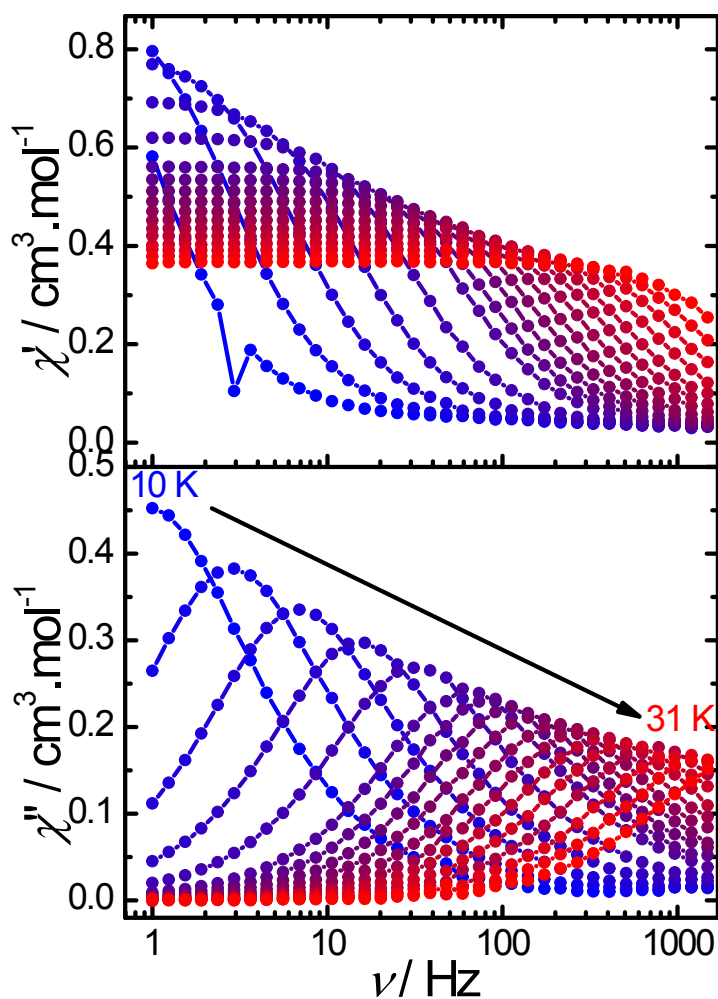

**Figure S8.** Frequency dependence of  $\chi'$  and  $\chi''$  for **2** under a 2000 Oe dc field.

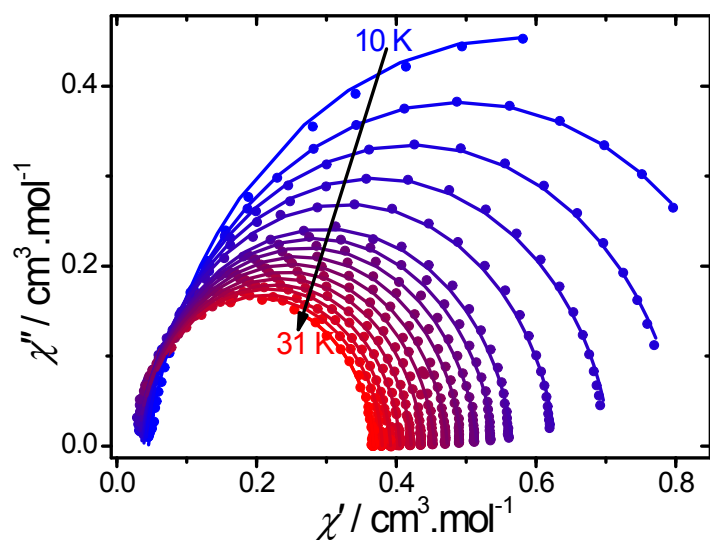

**Figure S9:** Cole-Cole (Argand) plots obtained using the ac susceptibility data for **2** (2000 Oe). The solid lines correspond to the best fit obtained with a generalized Debye model.

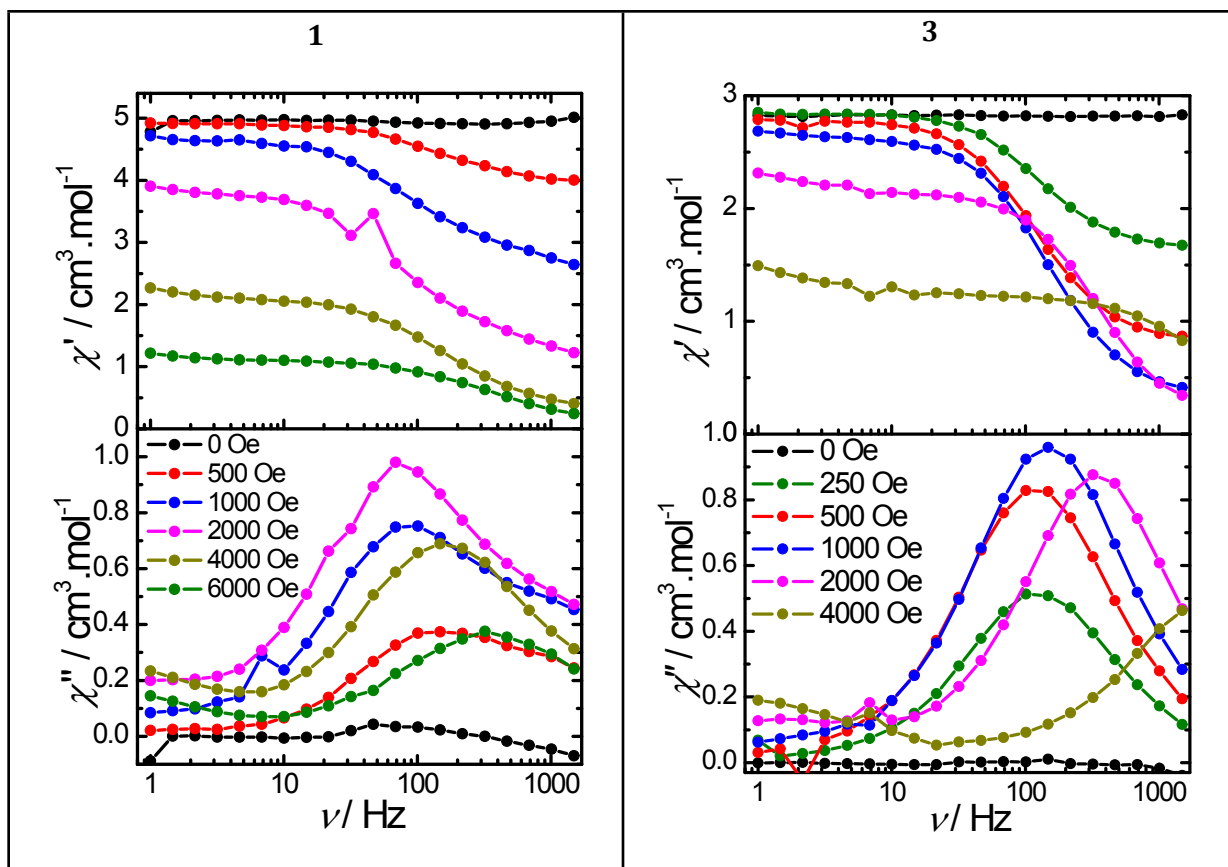

**Figure S10.** Frequency dependence of  $\chi'$  and  $\chi''$  at 2 K under various dc fields for **1** and **3**.

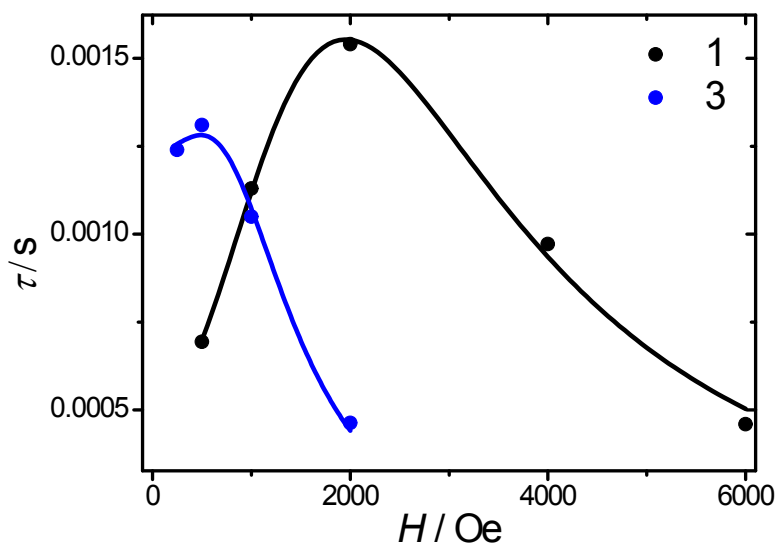

**Figure S11.** Field dependence of the relaxation time for **1** and **3** at 2 K. The solid lines represent the fit with Eq. 2.

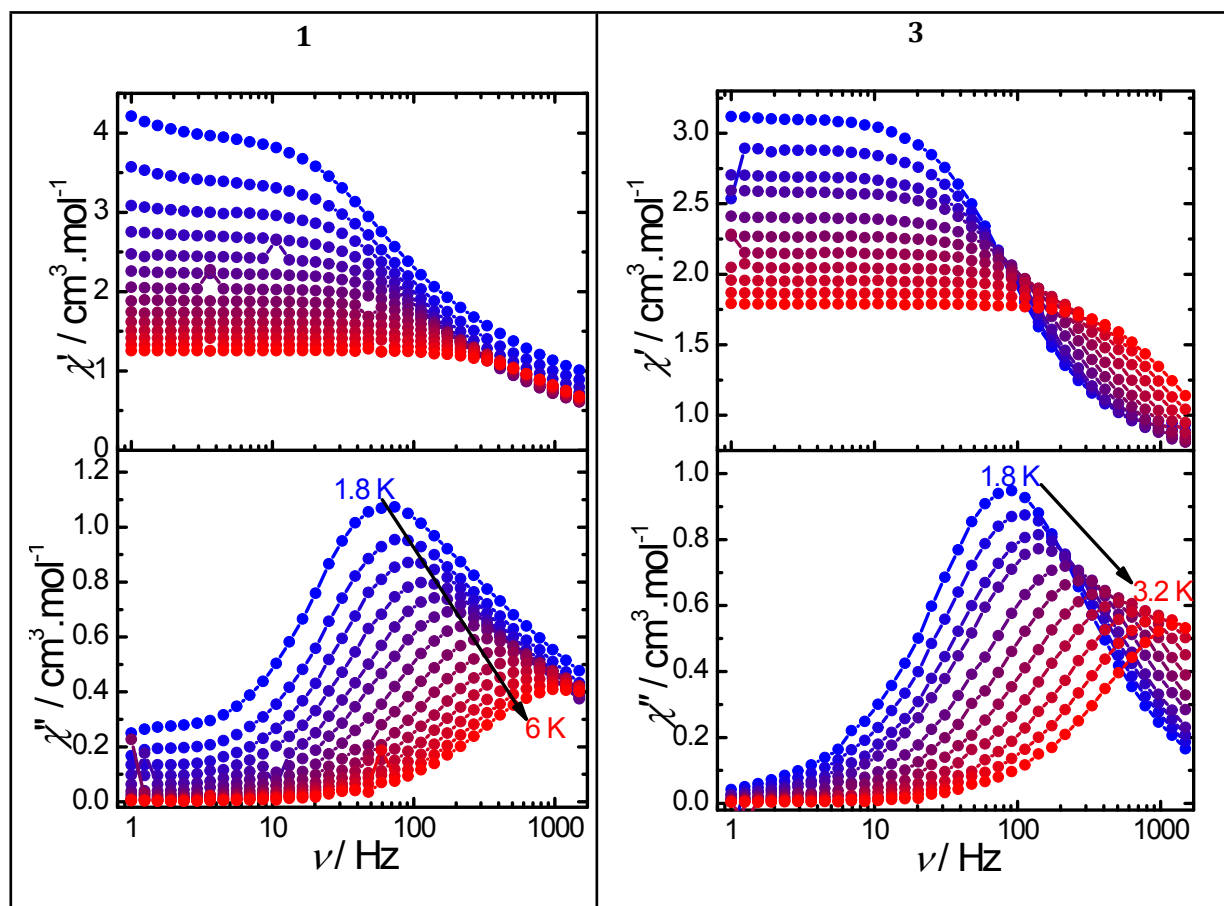

**Figure S12.** Frequency dependence of  $\chi'$  and  $\chi''$  for **1** (2000 Oe) and **3** (500 Oe).

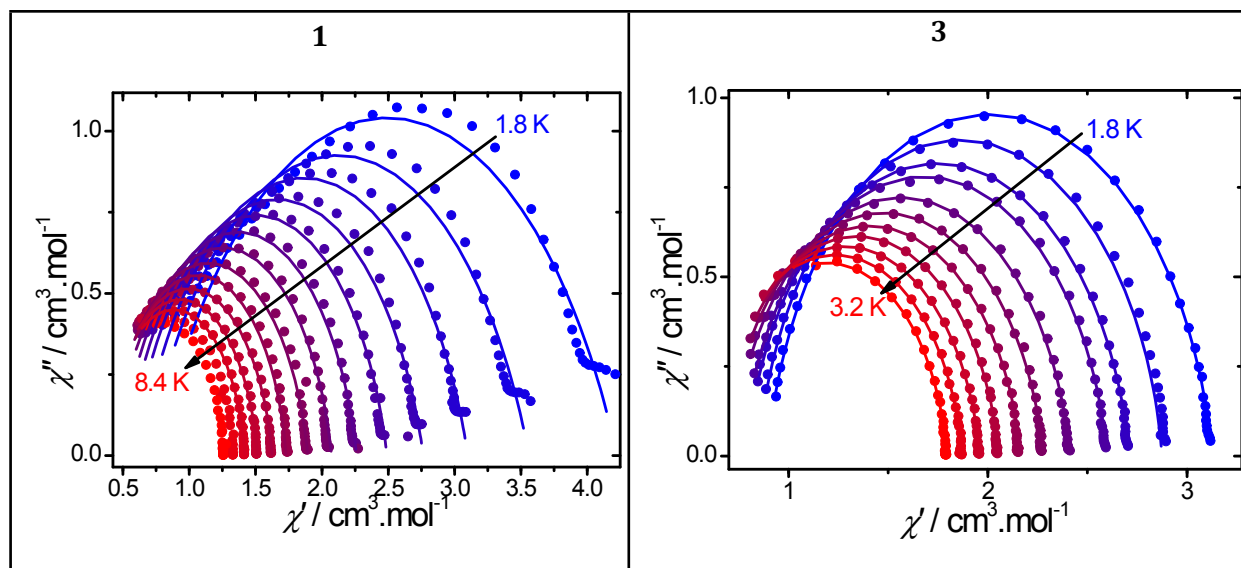

**Figure S13.** Cole-Cole (Argand) plots obtained using the ac susceptibility data for **1** (2000 Oe) and **3** (500 Oe). The solid lines correspond to the best fit obtained with a generalized Debye model.

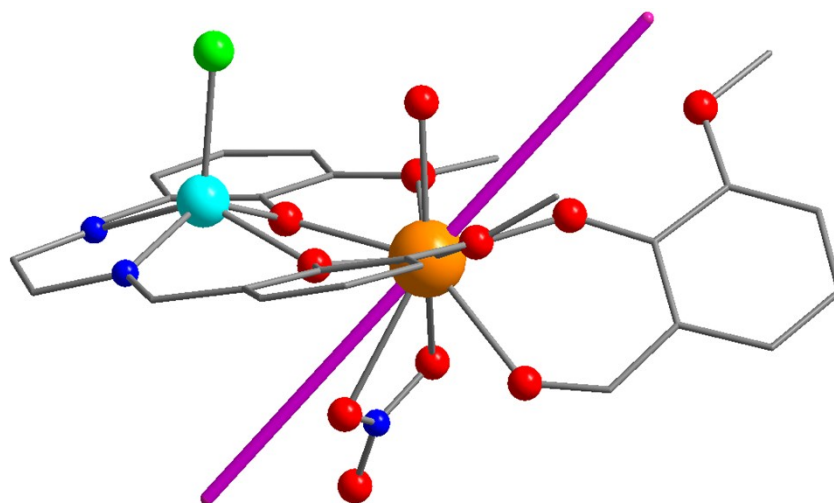

**Figure S14.** Orientation of the anisotropic axis (purple) for **2** obtained with the MAGELLAN software.<sup>2</sup>

**Table S1.** The crystal data and structures refinement details for complexes **1–3**.

| Identification code                         | 1                                                                     | 2                                                                     | 3                                                                     |
|---------------------------------------------|-----------------------------------------------------------------------|-----------------------------------------------------------------------|-----------------------------------------------------------------------|
| Empirical formula                           | C <sub>26</sub> H <sub>29</sub> ClN <sub>3</sub> O <sub>12</sub> TbZn | C <sub>26</sub> H <sub>29</sub> ClDyN <sub>3</sub> O <sub>12</sub> Zn | C <sub>26</sub> H <sub>29</sub> ClErN <sub>3</sub> O <sub>12</sub> Zn |
| Formula weight                              | 834.25                                                                | 838.84                                                                | 843.60                                                                |
| Temperature/K                               | 296.15                                                                | 296.15                                                                | 273.15                                                                |
| Crystal system                              | monoclinic                                                            | monoclinic                                                            | monoclinic                                                            |
| Space group                                 | P2 <sub>1</sub> /c                                                    | P2 <sub>1</sub> /c                                                    | P2 <sub>1</sub> /c                                                    |
| a/Å                                         | 8.7869(2)                                                             | 8.764(2)                                                              | 8.7916(5)                                                             |
| b/Å                                         | 14.7296(3)                                                            | 14.599(5)                                                             | 14.7051(7)                                                            |
| c/Å                                         | 23.0656(4)                                                            | 23.079(8)                                                             | 22.9881(13)                                                           |
| α/°                                         | 90                                                                    | 90                                                                    | 90                                                                    |
| β/°                                         | 90.5950(10)                                                           | 91.124(15)                                                            | 90.723(2)                                                             |
| γ/°                                         | 90                                                                    | 90                                                                    | 90                                                                    |
| Volume/Å <sup>3</sup>                       | 2985.16(10)                                                           | 2952.3(16)                                                            | 2971.7(3)                                                             |
| Z                                           | 4                                                                     | 4                                                                     | 4                                                                     |
| ρ <sub>calc</sub> /cm <sup>3</sup>          | 1.856                                                                 | 1.887                                                                 | 1.886                                                                 |
| μ/mm <sup>-1</sup>                          | 3.310                                                                 | 3.483                                                                 | 3.769                                                                 |
| F(000)                                      | 1652.0                                                                | 1660.0                                                                | 1668.0                                                                |
| Crystal size/mm <sup>3</sup>                | 0.18 × 0.15 × 0.11                                                    | 0.18 × 0.16 × 0.13                                                    | 0.16 × 0.14 × 0.1                                                     |
| Radiation                                   | MoKα (λ = 0.71073)                                                    | MoKα (λ = 0.71073)                                                    | MoKα (λ = 0.71073)                                                    |
| 2θ range for data collection/°              | 7.59 to 66.282                                                        | 7.456 to 56.562                                                       | 6.428 to 61.192                                                       |
| Index ranges                                | -12 ≤ h ≤ 13, -22 ≤ k ≤ 22, -35 ≤ l ≤ 35                              | -11 ≤ h ≤ 11, -19 ≤ k ≤ 19, -30 ≤ l ≤ 30                              | -12 ≤ h ≤ 12, -21 ≤ k ≤ 21, -31 ≤ l ≤ 32                              |
| Reflections collected                       | 80993                                                                 | 18007                                                                 | 34543                                                                 |
| Independent reflections                     | 11365 [R <sub>int</sub> = 0.0267, R <sub>sigma</sub> = 0.0177]        | 7034 [R <sub>int</sub> = 0.0292, R <sub>sigma</sub> = 0.0383]         | 9047 [R <sub>int</sub> = 0.0984, R <sub>sigma</sub> = 0.1054]         |
| Data/restraints/parameters                  | 11365/6/413                                                           | 7034/0/402                                                            | 9047/0/413                                                            |
| Goodness-of-fit on F <sup>2</sup>           | 1.094                                                                 | 1.020                                                                 | 1.030                                                                 |
| Final R indexes [I ≥ 2σ (I)]                | R <sub>1</sub> = 0.0299, wR <sub>2</sub> = 0.0720                     | R <sub>1</sub> = 0.0297, wR <sub>2</sub> = 0.0769                     | R <sub>1</sub> = 0.0583, wR <sub>2</sub> = 0.1530                     |
| Final R indexes [all data]                  | R <sub>1</sub> = 0.0396, wR <sub>2</sub> = 0.0768                     | R <sub>1</sub> = 0.0414, wR <sub>2</sub> = 0.0830                     | R <sub>1</sub> = 0.0777, wR <sub>2</sub> = 0.1663                     |
| Largest diff. peak/hole / e Å <sup>-3</sup> | 1.09/-0.82                                                            | 1.06/-1.12                                                            | 1.77/-1.71                                                            |

**Table S2.** Bond distances (in Å) for the two crystallographically independent metallic coordination environments present in compounds **1-3**

| 1         |             | 2         |             | 3         |             |
|-----------|-------------|-----------|-------------|-----------|-------------|
| Atom—Atom | Length (Å)  | Atom—Atom | Length (Å)  | Atom—Atom | Length (Å)  |
| Tb1—O1W   | 2.368 (2)   | Dy1—O1W   | 2.344 (3)   | Er1—O1W   | 2.327 (4)   |
| Tb1—O1    | 2.6765 (19) | Dy1—O1    | 2.692 (3)   | Er1—O1    | 2.686 (4)   |
| Tb1—O2    | 2.2979 (17) | Dy1—O2    | 2.311 (3)   | Er1—O2    | 2.270 (4)   |
| Tb1—O3    | 2.3126 (17) | Dy1—O3    | 2.272 (2)   | Er1—O3    | 2.264 (3)   |
| Tb1—O4    | 2.7000 (17) | Dy1—O4    | 2.672 (3)   | Er1—O4    | 2.692 (4)   |
| Tb1—O5    | 2.2211 (17) | Dy1—O5    | 2.416 (3)   | Er1—O5    | 2.181 (4)   |
| Tb1—O6    | 2.4255 (19) | Dy1—O6    | 2.201 (3)   | Er1—O6    | 2.385 (4)   |
| Tb1—O8    | 2.609 (2)   | Dy1—O8    | 2.457 (3)   | Er1—O8    | 2.586 (5)   |
| Tb1—O9    | 2.4876 (19) | Dy1—O9    | 2.588 (3)   | Er1—O9    | 2.435 (4)   |
| Zn1—Cl1   | 2.2792 (8)  | Zn1—Cl1   | 2.2633 (14) | Zn1—Cl1   | 2.2793 (16) |
| Zn1—O2    | 2.0494 (16) | Zn1—O2    | 2.019 (3)   | Zn1—O2    | 2.037 (4)   |
| Zn1—O3    | 2.0345 (18) | Zn1—O3    | 2.051 (2)   | Zn1—O3    | 2.046 (4)   |
| Zn1—N1    | 2.042 (3)   | Zn1—N1    | 2.045 (3)   | Zn1—N1    | 2.031 (5)   |
| Zn1—N2    | 2.044 (2)   | Zn1—N2    | 2.031 (4)   | Zn1—N2    | 2.050 (5)   |

**Table S3.** Bond angles (in degrees) for the two crystallographically independent metallic coordination environments present in compounds **1-3**

| 1              |            |                |            |
|----------------|------------|----------------|------------|
| Atom—Atom—Atom | Angles (°) | Atom—Atom—Atom | Angles (°) |
| O1W—Tb1—O2     | 80.69 (7)  | O3—Tb1—O6      | 145.97 (6) |
| O1W—Tb1—O3     | 80.09 (7)  | O3—Tb1—O8      | 75.33 (6)  |
| O1W—Tb1—O4     | 78.66 (8)  | O3—Tb1—O9      | 83.68 (7)  |
| O1W—Tb1—O5     | 78.32 (7)  | O4—Tb1—O5      | 76.06 (6)  |
| O1W—Tb1—O6     | 131.20 (7) | O4—Tb1—O6      | 129.29 (6) |
| O1W—Tb1—O8     | 150.47 (7) | O4—Tb1—O8      | 102.81 (6) |
| O1W—Tb1—O9     | 143.11 (7) | O4—Tb1—O9      | 64.51 (6)  |
| O1W—Tb1—O1     | 70.81 (7)  | O5—Tb1—O6      | 73.28 (7)  |
| O1—Tb1—O2      | 61.64 (6)  | O5—Tb1—O8      | 131.00 (7) |
| O1—Tb1—O3      | 124.62 (6) | O5—Tb1—O9      | 90.42 (7)  |
| O1—Tb1—O4      | 146.39 (6) | O6—Tb1—O8      | 70.72 (6)  |
| O1—Tb1—O5      | 84.17 (6)  | O6—Tb1—O9      | 76.29 (6)  |
| O1—Tb1—O6      | 67.57 (6)  | O8—Tb1—O9      | 49.56 (6)  |
| O1—Tb1—O8      | 110.66 (6) | Cl1—Zn1—O2     | 106.13 (5) |
| O1—Tb1—O9      | 143.50 (6) | Cl1—Zn1—O3     | 108.16 (6) |
| O2—Tb1—O3      | 67.99 (6)  | Cl1—Zn1—N1     | 110.52 (9) |
| O2—Tb1—O4      | 127.24 (6) | Cl1—Zn1—N2     | 114.67 (7) |
| O2—Tb1—O5      | 144.27 (7) | O2—Zn1—O3      | 78.28 (7)  |
| O2—Tb1—O6      | 100.44 (6) | O2—Zn1—N1      | 85.98 (8)  |
| O2—Tb1—O8      | 75.12 (6)  | O2—Zn1—N2      | 139.16 (8) |

|           |            |           |             |
|-----------|------------|-----------|-------------|
| O2—Tb1—O9 | 122.92 (7) | O3—Zn1—N1 | 140.93 (10) |
| O3—Tb1—O4 | 60.92 (6)  | O3—Zn1—N2 | 87.10 (8)   |
| O3—Tb1—O5 | 134.76 (6) | N1—Zn1—N2 | 81.85 (10)  |



| 2              |             |                |             |
|----------------|-------------|----------------|-------------|
| Atom—Atom—Atom | Angles (°)  | Atom—Atom—Atom | Angles (°)  |
| O1W—Dy1—O1     | 78.57 (9)   | O3—Dy1—O6      | 144.08 (9)  |
| O1W—Dy1—O2     | 80.12 (10)  | O3—Dy1—O8      | 122.84 (9)  |
| O1W—Dy1—O3     | 80.51 (9)   | O3—Dy1—O9      | 74.81 (9)   |
| O1W—Dy1—O4     | 70.82 (9)   | O4—Dy1—O5      | 67.06 (9)   |
| O1W—Dy1—O5     | 131.23 (10) | O4—Dy1—O6      | 83.35 (9)   |
| O1W—Dy1—O6     | 78.69 (10)  | O4—Dy1—O8      | 143.57 (9)  |
| O1W—Dy1—O8     | 143.00 (9)  | O4—Dy1—O9      | 110.77 (8)  |
| O1W—Dy1—O9     | 150.01 (10) | O5—Dy1—O6      | 73.19 (9)   |
| O1—Dy1—O2      | 60.62 (9)   | O5—Dy1—O8      | 76.78 (9)   |
| O1—Dy1—O3      | 127.05 (8)  | O5—Dy1—O9      | 70.75 (9)   |
| O1—Dy1—O4      | 146.09 (8)  | O6—Dy1—O8      | 90.62 (10)  |
| O1—Dy1—O5      | 129.85 (9)  | O6—Dy1—O9      | 131.14 (10) |
| O1—Dy1—O6      | 76.55 (9)   | O8—Dy1—O9      | 49.85 (9)   |
| O1—Dy1—O8      | 64.46 (8)   | Cl1—Zn1—O2     | 107.86 (8)  |
| O1—Dy1—O9      | 103.01 (8)  | Cl1—Zn1—O3     | 105.52 (7)  |
| O2—Dy1—O3      | 68.18 (8)   | Cl1—Zn1—N1     | 114.50 (9)  |
| O2—Dy1—O4      | 125.35 (9)  | Cl1—Zn1—N2     | 110.32 (9)  |
| O2—Dy1—O5      | 145.77 (9)  | O2—Zn1—O3      | 78.25 (9)   |
| O2—Dy1—O6      | 135.07 (9)  | O2—Zn1—N1      | 87.84 (11)  |
| O2—Dy1—O8      | 83.19 (9)   | O2—Zn1—N2      | 141.44 (11) |
| O2—Dy1—O9      | 75.10 (9)   | O3—Zn1—N1      | 139.95 (11) |
| O3—Dy1—O4      | 62.20 (8)   | O3—Zn1—N2      | 86.59 (11)  |
| O3—Dy1—O5      | 100.08 (8)  | N1—Zn1—N2      | 81.34 (14)  |
| 3              |             |                |             |
| Atom—Atom—Atom | Angles (°)  | Atom—Atom—Atom | Angles (°)  |
| O1W—Er1—O1     | 78.11 (14)  | O3—Er1—O6      | 98.35 (13)  |
| O1W—Er1—O2     | 80.24 (16)  | O3—Er1—O8      | 74.48 (13)  |
| O1W—Er1—O3     | 81.38 (14)  | O3—Er1—O9      | 122.98 (14) |
| O1W—Er1—O4     | 70.76 (14)  | O4—Er1—O5      | 82.48 (15)  |
| O1W—Er1—O5     | 78.27 (16)  | O4—Er1—O6      | 67.00 (14)  |
| O1W—Er1—O6     | 131.76 (15) | O4—Er1—O8      | 111.72 (13) |
| O1W—Er1—O8     | 149.88 (15) | O4—Er1—O9      | 143.73 (14) |
| O1W—Er1—O9     | 142.51 (15) | O5—Er1—O6      | 74.19 (15)  |
| O1—Er1—O2      | 61.51 (13)  | O5—Er1—O8      | 131.61 (15) |
| O1—Er1—O3      | 128.67 (13) | O5—Er1—O9      | 90.65 (16)  |
| O1—Er1—O4      | 145.01 (13) | O6—Er1—O8      | 70.50 (14)  |
| O1—Er1—O5      | 75.80 (15)  | O6—Er1—O9      | 76.84 (15)  |
| O1—Er1—O6      | 129.97 (13) | O8—Er1—O9      | 50.00 (14)  |
| O1—Er1—O8      | 103.21 (13) | Cl1—Zn1—O2     | 108.33 (13) |

|           |             |            |             |
|-----------|-------------|------------|-------------|
| O1—Er1—O9 | 64.43 (14)  | Cl1—Zn1—O3 | 106.38 (10) |
| O2—Er1—O3 | 68.93 (13)  | Cl1—Zn1—N1 | 114.53 (14) |
| O2—Er1—O4 | 125.78 (14) | Cl1—Zn1—N2 | 111.15 (17) |
| O2—Er1—O5 | 135.20 (15) | O2—Zn1—O3  | 77.87 (14)  |
| O2—Er1—O6 | 144.86 (14) | O2—Zn1—N1  | 86.91 (17)  |
| O2—Er1—O8 | 74.50 (14)  | O2—Zn1—N2  | 140.1 (2)   |
| O2—Er1—O9 | 83.18 (15)  | O3—Zn1—N1  | 139.02 (16) |
| O3—Er1—O4 | 62.28 (13)  | O3—Zn1—N2  | 85.90 (17)  |
| O3—Er1—O5 | 143.56 (15) | N1—Zn1—N2  | 81.9 (2)    |

**Table S4.** Hydrogen bonding geometrical details (distances in Å and angles in degrees) for compounds **1-3**

| <b>1</b>                                                     |                   |                     |                     |                       |
|--------------------------------------------------------------|-------------------|---------------------|---------------------|-----------------------|
| <b><i>D—H...A</i></b>                                        | <b><i>D—H</i></b> | <b><i>H...A</i></b> | <b><i>D...A</i></b> | <b><i>D—H...A</i></b> |
| O1 <i>W</i> —H1 <i>WA</i> ...C11                             | 0.87              | 2.38                | 3.219 (2)           | 165                   |
| O1 <i>W</i> —H1 <i>WB</i> ...O2 <i>W</i>                     | 0.90              | 1.85                | 2.647 (4)           | 147                   |
| O2 <i>W</i> —H2 <i>WA</i> ...O9 <sup>i</sup>                 | 0.85              | 2.17                | 2.993 (3)           | 163                   |
| O2 <i>W</i> —H2 <i>WA</i> ...O10 <sup>i</sup>                | 0.85              | 2.50                | 3.173 (4)           | 137                   |
| O2 <i>W</i> —H2 <i>WB</i> ...O7                              | 0.85              | 2.53                | 2.936 (4)           | 110                   |
| C18—H18 <i>C</i> ...O5                                       | 0.96              | 2.51                | 3.188 (3)           | 127                   |
| C9 <i>B</i> —H9 <i>BA</i> ...O10 <sup>ii</sup>               | 0.97              | 2.57                | 3.533 (8)           | 174                   |
| Symmetry codes : (i) -x+1, y+1/2, -z+1/2; (ii) -x, -y, -z.   |                   |                     |                     |                       |
| <b>2</b>                                                     |                   |                     |                     |                       |
| <b><i>D—H...A</i></b>                                        | <b><i>D—H</i></b> | <b><i>H...A</i></b> | <b><i>D...A</i></b> | <b><i>D—H...A</i></b> |
| O1 <i>W</i> —H1 <i>WA</i> ...C11                             | 0.86              | 2.58                | 3.202 (3)           | 131                   |
| O1 <i>W</i> —H1 <i>WB</i> ...O2 <i>W</i>                     | 0.86              | 1.86                | 2.639 (5)           | 151                   |
| O2 <i>W</i> —H2 <i>WA</i> ...O8 <sup>i</sup>                 | 0.85              | 2.13                | 2.979 (5)           | 176                   |
| O2 <i>W</i> —H2 <i>WA</i> ...O10 <sup>i</sup>                | 0.85              | 2.53                | 3.140 (5)           | 129                   |
| O2 <i>W</i> —H2 <i>WB</i> ...O7                              | 0.85              | 2.15                | 2.918 (5)           | 151                   |
| C1—H1 <i>A</i> ...O6                                         | 0.96              | 2.50                | 3.180 (5)           | 128                   |
| Symmetry codes : (i) -x, y+1/2, -z+1/2.                      |                   |                     |                     |                       |
| <b>3</b>                                                     |                   |                     |                     |                       |
| <b><i>D—H...A</i></b>                                        | <b><i>D—H</i></b> | <b><i>H...A</i></b> | <b><i>D...A</i></b> | <b><i>D—H...A</i></b> |
| O1 <i>W</i> —H1 <i>WA</i> ...C11                             | 0.88              | 2.50                | 3.207 (5)           | 138                   |
| O1 <i>W</i> —H1 <i>WB</i> ...O2 <i>W</i>                     | 0.88              | 1.78                | 2.645 (8)           | 171                   |
| O2 <i>W</i> —H2 <i>WA</i> ...O7                              | 0.85              | 2.10                | 2.927 (8)           | 165                   |
| O2 <i>W</i> —H2 <i>WB</i> ...O9 <sup>i</sup>                 | 0.85              | 2.35                | 3.028 (8)           | 138                   |
| O2 <i>W</i> —H2 <i>WB</i> ...O10 <sup>i</sup>                | 0.85              | 2.35                | 3.168 (9)           | 162                   |
| C1—H1 <i>C</i> ...O5                                         | 0.96              | 2.50                | 3.166 (8)           | 127                   |
| C10 <i>A</i> —H10 <i>B</i> ...O10 <sup>ii</sup>              | 0.97              | 2.56                | 3.528 (18)          | 176                   |
| Symmetry codes : (i) -x, y+1/2, -z+1/2; (ii) -x+1, -y, -z+1. |                   |                     |                     |                       |

**Table S5.** SHAPE analysis for compounds **1-3**

(The deviation of the atom arrangement of coordination polyhedron from an ideal spherical capped square antiprism).

|               | Complex 1                                                                          | Complex 2                                                                           | Complex 3                                                                            |
|---------------|------------------------------------------------------------------------------------|-------------------------------------------------------------------------------------|--------------------------------------------------------------------------------------|
|               | 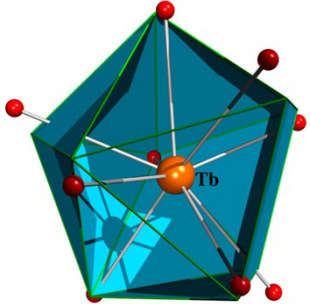 |  |  |
| <b>JCCU</b>   | 7.666                                                                              | 7.655                                                                               | 7.753                                                                                |
| <b>CCU</b>    | 6.908                                                                              | 6.929                                                                               | 7.106                                                                                |
| <b>JCSAPR</b> | 2.874                                                                              | 2.847                                                                               | 2.780                                                                                |
| <b>CSAPR</b>  | <b>2.466</b>                                                                       | <b>2.467</b>                                                                        | <b>2.457</b>                                                                         |
| <b>JTCTPR</b> | 3.452                                                                              | 3.363                                                                               | 3.049                                                                                |
| <b>TCTPR</b>  | 3.400                                                                              | 3.399                                                                               | 3.316                                                                                |

**JCCU:** Capped cube**CCU:** Spherical-relaxed capped cube**JCSAPR:** Capped square antiprism**CSAPR:** Spherical capped square antiprism**JTCTPR:** Tricapped trigonal prism**TCTPR:** Spherical tricapped trigonal prism**Table S6.** Fitting of the Cole-Cole plots with a generalized Debye model under a zero dc field for **2**.

| <i>T</i> (K) | $\chi_s$ (cm <sup>3</sup> ·mol <sup>-1</sup> ) | $\chi_T$ (cm <sup>3</sup> ·mol <sup>-1</sup> ) | $\alpha$ |
|--------------|------------------------------------------------|------------------------------------------------|----------|
| 2            | 0.16117                                        | 4.89953                                        | 0.27954  |
| 5            | 0.07726                                        | 2.09058                                        | 0.29934  |
| 10           | 0.05636                                        | 1.06483                                        | 0.25361  |
| 12           | 0.05518                                        | 0.86326                                        | 0.19357  |

|    |             |         |         |
|----|-------------|---------|---------|
| 14 | 0.04714     | 0.74113 | 0.1609  |
| 16 | 0.04227     | 0.64053 | 0.1231  |
| 18 | 0.04509     | 0.52292 | 0.03041 |
| 20 | 0.03281     | 0.51132 | 0.08356 |
| 21 | 0.03279     | 0.48728 | 0.07377 |
| 22 | 0.0325      | 0.46769 | 0.06974 |
| 23 | 0.03075     | 0.44499 | 0.06745 |
| 24 | 0.03432     | 0.42433 | 0.04364 |
| 25 | 0.03321     | 0.40599 | 0.0388  |
| 26 | 0.02981     | 0.39403 | 0.04652 |
| 27 | 0.02916     | 0.38017 | 0.04376 |
| 28 | 0.02718     | 0.36668 | 0.04002 |
| 29 | 0.02616     | 0.35418 | 0.03663 |
| 30 | 0.02041     | 0.34285 | 0.036   |
| 31 | 4.70461E-15 | 0.3367  | 0.06878 |

**Table S7:** Some examples of high energy barriers Zn/Dy SMMS.

| Nuclearity         | $U_{\text{eff}} (\text{cm}^{-1}), H = 0 \text{ Oe}$ | Reference |
|--------------------|-----------------------------------------------------|-----------|
| ZnDy               | 233                                                 | 3         |
| ZnDy               | 83                                                  | 4         |
| Zn <sub>2</sub> Dy | 89                                                  | 5         |
| Zn <sub>2</sub> Dy | 149                                                 | 5         |
| Zn <sub>2</sub> Dy | 140                                                 | 5         |
| Zn <sub>2</sub> Dy | 186                                                 | 6         |
| ZnDy               | 189                                                 | 7         |
| Zn <sub>2</sub> Dy | 298                                                 | 8         |
| Zn <sub>2</sub> Dy | 161                                                 | 8         |
| Zn <sub>2</sub> Dy | 86                                                  | 9         |

**Table S8:** Fit parameters of the field dependence of the relaxation time at 6 K for **1-3**.

| Compound        | $D (s^{-1}K^{-1}Oe^{-4})$ | $B_1 (s^{-1})$ | $B_2 (Oe^{-2})$      | $K$   |
|-----------------|---------------------------|----------------|----------------------|-------|
| <b>1</b> (2 K)  | $2.4 \times 10^{-5}$      | 1722.9         | $1.9 \times 10^{-6}$ | 255   |
| <b>2</b> (15 K) | $9.8 \times 10^{-15}$     | 123.03         | $7.5 \times 10^{-6}$ | 61.95 |
| <b>3</b> (2 K)  | $1.3 \times 10^{-5}$      | 810.4          | $9.9 \times 10^{-7}$ | -     |

**Table S9.** Fitting of the Cole-Cole plots with a generalized Debye model under a 2000 Oe field for **2**.

| $T$ (K) | $\chi_S$ (cm <sup>3</sup> . mol <sup>-1</sup> ) | $\chi_T$ (cm <sup>3</sup> . mol <sup>-1</sup> ) | $\alpha$   |
|---------|-------------------------------------------------|-------------------------------------------------|------------|
| 10      | 0.04528                                         | 1.10504                                         | 0.15844    |
| 12      | 0.03825                                         | 0.94637                                         | 0.05494    |
| 14      | 0.03505                                         | 0.80927                                         | 0.02239    |
| 16      | 0.03328                                         | 0.70652                                         | 0.01       |
| 18      | 0.03117                                         | 0.62743                                         | 0.00478    |
| 20      | 0.03                                            | 0.56601                                         | 0.00243    |
| 21      | 0.02942                                         | 0.5395                                          | 0.00177    |
| 22      | 0.02974                                         | 0.51561                                         | 0.0013     |
| 23      | 0.03062                                         | 0.49366                                         | 9.69631E-4 |
| 24      | 0.0302                                          | 0.47313                                         | 7.18017E-4 |
| 25      | 0.03227                                         | 0.4548                                          | 5.38383E-4 |
| 26      | 0.03218                                         | 0.43778                                         | 3.97852E-4 |
| 27      | 0.03352                                         | 0.42139                                         | 2.95942E-4 |
| 28      | 0.03178                                         | 0.40531                                         | 2.12712E-4 |
| 29      | 0.03606                                         | 0.39177                                         | 1.54137E-4 |
| 30      | 0.03399                                         | 0.37987                                         | 1.09211E-4 |
| 31      | 0.02068                                         | 0.36753                                         | 7.15328E-5 |

**Table S10.** Fitting of the Cole-Cole plots with a generalized Debye model under a 2000 Oe field for **1**.

| $T$ (K) | $\chi_S$ (cm <sup>3</sup> . mol <sup>-1</sup> ) | $\chi_T$ (cm <sup>3</sup> . mol <sup>-1</sup> ) | $\alpha$ |
|---------|-------------------------------------------------|-------------------------------------------------|----------|
| 1.8     | 0.89223                                         | 3.12505                                         | 0.09939  |
| 1.94    | 0.84643                                         | 2.87469                                         | 0.08757  |
| 2.08    | 0.78732                                         | 2.71067                                         | 0.10264  |
| 2.23    | 0.76177                                         | 2.59838                                         | 0.10283  |
| 2.36    | 0.71361                                         | 2.41243                                         | 0.10245  |
| 2.5     | 0.67881                                         | 2.27719                                         | 0.10234  |
| 2.64    | 0.64969                                         | 2.16491                                         | 0.10368  |
| 2.77    | 0.63121                                         | 2.05357                                         | 0.09293  |
| 2.92    | 0.60975                                         | 1.95839                                         | 0.08901  |
| 3.06    | 0.59866                                         | 1.86923                                         | 0.0774   |
| 3.2     | 0.59147                                         | 1.79133                                         | 0.06621  |

**Table S11.** Fitting of the Cole-Cole plots with a generalized Debye model under a 500 Oe field for **3**.

| $T$ (K) | $\chi_S$ (cm <sup>3</sup> . mol <sup>-1</sup> ) | $\chi_T$ (cm <sup>3</sup> . mol <sup>-1</sup> ) | $\alpha$ |
|---------|-------------------------------------------------|-------------------------------------------------|----------|
| 1.8     | 0.75528                                         | 4.22564                                         | 0.31175  |
| 2.3     | 0.68203                                         | 3.56107                                         | 0.2724   |

|      |         |         |         |
|------|---------|---------|---------|
| 2.81 | 0.62991 | 3.10083 | 0.22851 |
| 3.31 | 0.56641 | 2.76432 | 0.20665 |
| 3.83 | 0.52918 | 2.49092 | 0.17629 |
| 4.33 | 0.48273 | 2.26124 | 0.16031 |
| 4.85 | 0.43826 | 2.07209 | 0.15242 |
| 5.35 | 0.39289 | 1.89337 | 0.14723 |
| 5.87 | 0.40552 | 1.72943 | 0.11003 |
| 6.36 | 0.36526 | 1.62464 | 0.12699 |
| 6.88 | 0.35416 | 1.51406 | 0.11706 |
| 7.38 | 0.35215 | 1.4199  | 0.10752 |

### References

- 1 X. Lu, W. Bi, W. Chai, J. Song, J. Meng, W.-Y. Wong, W.-K. Wong and R. A. Jones, *New J. Chem.*, 2008, **32**, 127-131.
- 2 N. F. Chilton, D. Collison, E. J. L. McInnes, R. E. P. Winpenny and A. Soncini, *Nat. Commun.*, 2013, **4**, 2551.
- 3 A. Watanabe, A. Yamashita, M. Nakano, T. Yamamura and T. Kajiwara, *Chem. Eur. J.*, 2011, **17**, 7428-7432.
- 4 A. Upadhyay, S. K. Singh, C. Das, R. Mondol, S. K. Langley, K. S. Murray, G. Rajaraman and M. Shanmugam, *Chem. Commun.*, 2014, **50**, 8838-8841.
- 5 J. P. Costes, S. Titos-Padilla, I. Oyarzabal, T. Gupta, C. Duhayon, G. Rajaraman and E. Colacio, *Chem. Eur. J.*, 2015, **21**, 15785-15796.
- 6 I. Oyarzabal, J. Ruiz, E. Ruiz, D. Aravena, J. M. Seco and E. Colacio, *Chem. Commun.*, 2015, **51**, 12353-12356.
- 7 A. Amjad, A. M. Madalan, M. Andruh, A. Caneschi and L. Sorace, *Chem. Eur. J.*, 2016, **22**, 12849-12858.
- 8 W.-B. Sun, P.-F. Yan, S.-D. Jiang, B.-W. Wang, Y.-Q. Zhang, H.-F. Li, P. Chen, Z.-M. Wang and S. Gao, *Chem. Sci.*, 2016, **7**, 684-691.
- 9 H.-R. Wen, P.-P. Dong, S.-J. Liu, J.-S. Liao, F.-Y. Liang and C.-M. Liu, *Dalton Trans.*, 2017, **46**, 1153-1162.
